# Supplementary material
Source: publisher figshare collection journal article supplement (https://acs.figshare.com/ndownloader/files/3899392)
Supplement: Supplementary file 1 [file 3899392]

 
data_x 
 
_audit_creation_method            SHELXL-97 
_chemical_name_systematic 
; 
 ? 
; 
_chemical_name_common             ? 
_chemical_melting_point           ? 
_chemical_formula_moiety          ? 
_chemical_formula_sum 
 'C54 H62 Co4 N3 O25' 
_chemical_formula_weight          1388.79 
 
loop_ 
 _atom_type_symbol 
 _atom_type_description 
 _atom_type_scat_dispersion_real 
 _atom_type_scat_dispersion_imag 
 _atom_type_scat_source 
 'C'  'C'   0.0181   0.0091 
 'International Tables Vol C Tables 4.2.6.8 and 6.1.1.4' 
 'H'  'H'   0.0000   0.0000 
 'International Tables Vol C Tables 4.2.6.8 and 6.1.1.4' 
 'Co'  'Co'  -2.3653   3.6143 
 'International Tables Vol C Tables 4.2.6.8 and 6.1.1.4' 
 'N'  'N'   0.0311   0.0180 
 'International Tables Vol C Tables 4.2.6.8 and 6.1.1.4' 
 'O'  'O'   0.0492   0.0322 
 'International Tables Vol C Tables 4.2.6.8 and 6.1.1.4' 
 
_symmetry_cell_setting             monoclinic 
_symmetry_space_group_name_H-M    P21/c 
 
loop_ 
 _symmetry_equiv_pos_as_xyz 
 'x, y, z' 
 '-x, y+1/2, -z+1/2' 
 '-x, -y, -z' 
 'x, -y-1/2, z-1/2' 
 
_cell_length_a                    11.25340(10) 
_cell_length_b                    16.2117(2) 
_cell_length_c                    33.8757(4) 
_cell_angle_alpha                 90.00 
_cell_angle_beta                  102.4630(10) 
_cell_angle_gamma                 90.00 
_cell_volume                      6034.54(12) 
_cell_formula_units_Z             4 
_cell_measurement_temperature     293(2) 
_cell_measurement_reflns_used     ? 
_cell_measurement_theta_min       ? 
_cell_measurement_theta_max       ? 
 
_exptl_crystal_description        bar 
_exptl_crystal_colour             purple-black 
_exptl_crystal_size_max           0.12 
_exptl_crystal_size_mid           0.10 
_exptl_crystal_size_min           0.08 
_exptl_crystal_density_meas       ? 
_exptl_crystal_density_diffrn     1.529 
_exptl_crystal_density_method     'not measured' 
_exptl_crystal_F_000              2860 
_exptl_absorpt_coefficient_mu     9.188 
_exptl_absorpt_correction_type    ? 
_exptl_absorpt_correction_T_min   ? 
_exptl_absorpt_correction_T_max   ? 
_exptl_absorpt_process_details    ? 
 
_exptl_special_details 
; 
 ? 
; 
 
_diffrn_ambient_temperature       293(2) 
_diffrn_radiation_wavelength      1.54178 
_diffrn_radiation_type            CuK\a 
_diffrn_radiation_source          'fine-focus sealed tube' 
_diffrn_radiation_monochromator   graphite 
_diffrn_measurement_device_type   'Bruker APEX-II CCD'
_diffrn_measurement_method       '\f and \w scans'  
_diffrn_detector_area_resol_mean  ? 
_diffrn_standards_number          ? 
_diffrn_standards_interval_count  ? 
_diffrn_standards_interval_time   ? 
_diffrn_standards_decay_%         ? 
_diffrn_reflns_number             24530 
_diffrn_reflns_av_R_equivalents   0.0649 
_diffrn_reflns_av_sigmaI/netI     0.0796 
_diffrn_reflns_limit_h_min        -13 
_diffrn_reflns_limit_h_max        8 
_diffrn_reflns_limit_k_min        -19 
_diffrn_reflns_limit_k_max        19 
_diffrn_reflns_limit_l_min        -33 
_diffrn_reflns_limit_l_max        42 
_diffrn_reflns_theta_min          3.82 
_diffrn_reflns_theta_max          72.98 
_reflns_number_total              11748 
_reflns_number_gt                 8763 
_reflns_threshold_expression      >2sigma(I) 
 
_computing_data_collection        'Bruker APEX2'  
_computing_cell_refinement        'Bruker SAINT' 
_computing_data_reduction         'Bruker SAINT' 
_computing_structure_solution     'SHELXS-97 (Sheldrick, 1990)' 
_computing_structure_refinement   'SHELXL-97 (Sheldrick, 1997)' 
_computing_molecular_graphics     'Bruker SAINT' 
_computing_publication_material   'Bruker SAINT' 
 
_refine_special_details 
; 
 Refinement of F^2^ against ALL reflections.  The weighted R-factor wR and 
 goodness of fit S are based on F^2^, conventional R-factors R are based 
 on F, with F set to zero for negative F^2^. The threshold expression of 
 F^2^ > 2sigma(F^2^) is used only for calculating R-factors(gt) etc. and is 
 not relevant to the choice of reflections for refinement.  R-factors based 
 on F^2^ are statistically about twice as large as those based on F, and R- 
 factors based on ALL data will be even larger. 
; 
 
_refine_ls_structure_factor_coef  Fsqd  
_refine_ls_matrix_type            full 
_refine_ls_weighting_scheme       calc  
_refine_ls_weighting_details 
 'calc w=1/[\s^2^(Fo^2^)+(0.1349P)^2^+0.0000P] where P=(Fo^2^+2Fc^2^)/3' 
_atom_sites_solution_primary      direct 
_atom_sites_solution_secondary    difmap 
_atom_sites_solution_hydrogens    geom 
_refine_ls_hydrogen_treatment     mixed 
_refine_ls_extinction_method      none 
_refine_ls_extinction_coef        ? 
_refine_ls_number_reflns          11748 
_refine_ls_number_parameters      784 
_refine_ls_number_restraints      54 
_refine_ls_R_factor_all           0.0909 
_refine_ls_R_factor_gt            0.0683 
_refine_ls_wR_factor_ref          0.1994 
_refine_ls_wR_factor_gt           0.1842 
_refine_ls_goodness_of_fit_ref    1.010 
_refine_ls_restrained_S_all       1.015 
_refine_ls_shift/su_max           0.005 
_refine_ls_shift/su_mean          0.000 
 
loop_ 
 _atom_site_label 
 _atom_site_type_symbol 
 _atom_site_fract_x 
 _atom_site_fract_y 
 _atom_site_fract_z 
 _atom_site_U_iso_or_equiv 
 _atom_site_adp_type 
 _atom_site_occupancy 
 _atom_site_symmetry_multiplicity 
 _atom_site_calc_flag 
 _atom_site_refinement_flags 
 _atom_site_disorder_assembly 
 _atom_site_disorder_group 
Co1 Co 0.14712(6) 0.57950(4) 0.19503(2) 0.00971(17) Uani 1 1 d . . . 
Co2 Co -0.38682(7) 0.95925(4) 0.03594(2) 0.01047(17) Uani 1 1 d . . . 
Co3 Co -0.01862(6) 0.43410(4) 0.14658(2) 0.00901(17) Uani 1 1 d . . . 
Co4 Co 0.23566(6) 0.50714(4) 0.11403(2) 0.00955(17) Uani 1 1 d . . . 
O1 O 0.0932(3) 0.53142(19) 0.13788(9) 0.0105(6) Uani 1 1 d . . . 
O2 O 0.3291(3) 0.5985(2) 0.19969(11) 0.0224(8) Uani 1 1 d . . . 
O3 O 0.1163(3) 0.7006(2) 0.19901(11) 0.0235(8) Uani 1 1 d . . . 
O4 O -0.0390(3) 0.5747(3) 0.20272(12) 0.0245(8) Uani 1 1 d . . . 
O5 O 0.1778(3) 0.4844(3) 0.23244(11) 0.0230(8) Uani 1 1 d . . . 
O6 O -0.3846(3) 1.0816(2) 0.03780(10) 0.0198(7) Uani 1 1 d . . . 
O7 O -0.2609(3) 0.9209(2) 0.08125(10) 0.0204(8) Uani 1 1 d . . . 
O8 O -0.3022(4) 0.9384(2) -0.00888(11) 0.0231(8) Uani 1 1 d . . . 
O9 O 0.0228(3) 0.3992(2) 0.20661(9) 0.0184(7) Uani 1 1 d . . . 
O10 O -0.1649(3) 0.5000(2) 0.15576(11) 0.0205(8) Uani 1 1 d . . . 
O11 O 0.3890(3) 0.5163(2) 0.15474(11) 0.0211(8) Uani 1 1 d . . . 
O12 O -0.2383(4) 1.4446(2) -0.06123(11) 0.0284(9) Uani 1 1 d . . . 
O13 O -0.2226(3) 0.6092(2) -0.09468(11) 0.0202(7) Uani 1 1 d . . . 
O14 O -0.1245(3) 0.6498(2) -0.14160(9) 0.0136(7) Uani 1 1 d . . . 
O15 O -0.5412(3) 0.8980(2) 0.02812(10) 0.0175(7) Uani 1 1 d . . . 
O20 O 0.0067(5) 0.6934(3) 0.13565(12) 0.0408(12) Uani 1 1 d . . . 
O21 O -0.3771(4) 0.9714(3) 0.12074(13) 0.0363(10) Uani 1 1 d . . . 
O22 O -0.3261(4) 0.8050(3) 0.00358(13) 0.0356(10) Uani 1 1 d . . . 
O23 O 0.1127(4) 0.9139(3) -0.11075(15) 0.0439(12) Uani 1 1 d . . . 
O24 O 0.0637(5) 1.0003(3) -0.06592(16) 0.0472(13) Uani 1 1 d . . . 
O25 O 0.8213(3) 0.7466(3) 0.29593(13) 0.0359(11) Uani 1 1 d . . . 
O26 O 0.6272(4) 0.7658(5) 0.2953(2) 0.078(2) Uani 1 1 d . . . 
O27 O -0.3059(7) 1.3359(4) -0.09711(13) 0.075(2) Uani 1 1 d . . . 
O28 O -0.0916(3) 1.4180(2) 0.08512(11) 0.0229(8) Uani 1 1 d . . . 
O29 O -0.1557(3) 1.3192(2) 0.11971(10) 0.0221(8) Uani 1 1 d . . . 
C17 C -0.2738(4) 1.2378(3) 0.04555(13) 0.0145(9) Uani 1 1 d . . . 
H17A H -0.2704 1.2076 0.0691 0.017 Uiso 1 1 calc R . . 
C19 C -0.3980(4) 1.1238(3) 0.00591(14) 0.0124(9) Uani 1 1 d . . . 
C20 C -0.1677(4) 0.6622(3) -0.11067(13) 0.0104(8) Uani 1 1 d . . . 
C21 C 0.7526(4) 0.5855(3) 0.20053(15) 0.0150(9) Uani 1 1 d . . . 
C24 C 0.6328(4) 0.5602(3) 0.18459(14) 0.0137(9) Uani 1 1 d . . . 
H24A H 0.6169 0.5223 0.1635 0.016 Uiso 1 1 calc R . . 
C25 C 0.1018(4) 0.4272(3) 0.23507(14) 0.0152(9) Uani 1 1 d . . . 
C27 C 0.0322(5) 0.7247(3) 0.16954(16) 0.0227(11) Uani 1 1 d . . . 
C28 C -0.1511(4) 1.3525(3) 0.08655(14) 0.0139(9) Uani 1 1 d . . . 
C30 C -0.0413(4) 0.7989(3) 0.17735(14) 0.0160(9) Uani 1 1 d . . . 
C31 C -0.2859(5) 0.9340(3) 0.11622(14) 0.0163(10) Uani 1 1 d . . . 
C32 C 0.7749(4) 0.6417(3) 0.23149(15) 0.0192(10) Uani 1 1 d . . . 
H32A H 0.8544 0.6591 0.2417 0.023 Uiso 1 1 calc R . . 
C33 C -0.1528(5) 0.7453(3) -0.09121(14) 0.0160(10) Uani 1 1 d . . . 
C34 C -0.2177(4) 1.3147(3) 0.04714(13) 0.0128(9) Uani 1 1 d . . . 
C35 C -0.1941(4) 0.9268(3) 0.19044(14) 0.0153(9) Uani 1 1 d . . . 
H35A H -0.2477 0.9679 0.1946 0.018 Uiso 1 1 calc R . . 
C36 C -0.1192(5) 0.8354(3) 0.14539(14) 0.0171(10) Uani 1 1 d . . . 
H36A H -0.1204 0.8176 0.1192 0.021 Uiso 1 1 calc R . . 
C37 C 0.4072(4) 0.5665(3) 0.18330(14) 0.0134(9) Uani 1 1 d . . . 
C38 C -0.1961(4) 0.8987(3) 0.15164(14) 0.0158(9) Uani 1 1 d . . . 
C39 C -0.0359(4) 0.8282(3) 0.21653(14) 0.0162(10) Uani 1 1 d . . . 
H39A H 0.0180 0.8045 0.2382 0.019 Uiso 1 1 calc R . . 
C40 C -0.2191(4) 1.3587(3) 0.01157(14) 0.0162(10) Uani 1 1 d . . . 
H40A H -0.1810 1.4098 0.0126 0.019 Uiso 1 1 calc R . . 
C41 C 0.1115(4) 0.3932(3) 0.27677(14) 0.0160(9) Uani 1 1 d . . . 
C42 C -0.2844(5) 0.8617(3) -0.01393(15) 0.0213(11) Uani 1 1 d . . . 
C43 C -0.3351(4) 1.2062(3) 0.00841(14) 0.0148(9) Uani 1 1 d . . . 
C44 C -0.1187(5) 0.8964(3) -0.05125(17) 0.0252(12) Uani 1 1 d . . . 
H44A H -0.1077 0.9471 -0.0381 0.030 Uiso 1 1 calc R . . 
C45 C -0.0660(5) 0.8006(3) -0.09905(15) 0.0182(10) Uani 1 1 d . . . 
H45A H -0.0201 0.7873 -0.1179 0.022 Uiso 1 1 calc R . . 
C46 C 0.5368(4) 0.5918(3) 0.20038(15) 0.0152(9) Uani 1 1 d . . . 
C49 C 0.6817(4) 0.6732(3) 0.24791(15) 0.0205(11) Uani 1 1 d . . . 
C50 C -0.1416(4) 0.5511(3) 0.18493(14) 0.0150(9) Uani 1 1 d . . . 
C51 C -0.2777(5) 1.3257(3) -0.02526(14) 0.0182(10) Uani 1 1 d . . . 
C53 C -0.3370(5) 1.2498(3) -0.02697(14) 0.0193(10) Uani 1 1 d . . . 
H53A H -0.3777 1.2286 -0.0517 0.023 Uiso 1 1 calc R . . 
C54 C 0.5617(4) 0.6481(3) 0.23185(15) 0.0186(10) Uani 1 1 d . . . 
H54A H 0.4984 0.6695 0.2424 0.022 Uiso 1 1 calc R . . 
C55 C -0.2056(5) 0.8416(3) -0.04359(16) 0.0210(11) Uani 1 1 d . . . 
C56 C 0.0506(5) 0.9312(3) -0.08714(18) 0.0268(12) Uani 1 1 d . . . 
C57 C -0.2758(6) 1.3716(3) -0.06446(16) 0.0266(12) Uani 1 1 d . . . 
C58 C -0.2214(5) 0.7658(3) -0.06325(15) 0.0195(10) Uani 1 1 d . . . 
H58A H -0.2784 0.7286 -0.0576 0.023 Uiso 1 1 calc R . . 
C61 C 0.7051(5) 0.7333(4) 0.28209(17) 0.0273(13) Uani 1 1 d . . . 
C63 C -0.0479(5) 0.8752(3) -0.07876(16) 0.0212(11) Uani 1 1 d . . . 
N1 N 0.7031(4) 0.2399(4) 0.16381(16) 0.0352(12) Uani 1 1 d . . . 
C70 C 0.5557(16) 0.1281(10) 0.1713(6) 0.165(9) Uani 1 1 d . . . 
H70A H 0.5096 0.0833 0.1571 0.248 Uiso 1 1 calc R . . 
H70B H 0.5012 0.1680 0.1787 0.248 Uiso 1 1 calc R . . 
H70C H 0.6090 0.1075 0.1953 0.248 Uiso 1 1 calc R . . 
C71 C 0.5360(9) 0.3344(11) 0.1290(4) 0.110(5) Uani 1 1 d . . . 
H71A H 0.4850 0.3796 0.1332 0.166 Uiso 1 1 calc R . . 
H71B H 0.4861 0.2877 0.1189 0.166 Uiso 1 1 calc R . . 
H71C H 0.5833 0.3501 0.1098 0.166 Uiso 1 1 calc R . . 
C72 C 0.7849(10) 0.2294(8) 0.2016(3) 0.076(3) Uani 1 1 d . . . 
H72A H 0.7392 0.2131 0.2215 0.091 Uiso 1 1 calc R . . 
H72B H 0.8235 0.2819 0.2100 0.091 Uiso 1 1 calc R . . 
C73 C 0.6191(10) 0.3120(7) 0.1681(3) 0.083(3) Uani 1 1 d . . . 
H73A H 0.5708 0.2975 0.1876 0.099 Uiso 1 1 calc R . . 
H73B H 0.6682 0.3597 0.1785 0.099 Uiso 1 1 calc R . . 
C74 C 0.6307(11) 0.1686(7) 0.1443(3) 0.085(4) Uani 1 1 d . . . 
H74A H 0.6854 0.1279 0.1370 0.102 Uiso 1 1 calc R . . 
H74B H 0.5765 0.1871 0.1196 0.102 Uiso 1 1 calc R . . 
C75 C 0.8847(7) 0.1643(6) 0.2007(2) 0.057(2) Uani 1 1 d . . . 
H75A H 0.9373 0.1603 0.2270 0.085 Uiso 1 1 calc R . . 
H75B H 0.9313 0.1804 0.1814 0.085 Uiso 1 1 calc R . . 
H75C H 0.8473 0.1117 0.1932 0.085 Uiso 1 1 calc R . . 
N2 N 0.7199(5) 0.6433(4) 0.03337(18) 0.0402(13) Uani 1 1 d . . . 
C80 C 0.8455(11) 0.6210(12) 0.0441(8) 0.200(12) Uani 1 1 d . . . 
H80A H 0.8695 0.6268 0.0732 0.240 Uiso 1 1 calc R . . 
H80B H 0.8490 0.5625 0.0385 0.240 Uiso 1 1 calc R . . 
C81 C 0.667(3) 0.6361(11) 0.0691(6) 0.277(19) Uani 1 1 d . . . 
H81A H 0.5874 0.6114 0.0595 0.332 Uiso 1 1 calc R . . 
H81B H 0.7155 0.5949 0.0861 0.332 Uiso 1 1 calc R . . 
C82 C 0.6615(17) 0.5862(7) 0.0026(5) 0.164(10) Uani 1 1 d . . . 
H82A H 0.7217 0.5711 -0.0128 0.197 Uiso 1 1 calc R . . 
H82B H 0.6445 0.5367 0.0165 0.197 Uiso 1 1 calc R . . 
C83 C 0.6494(10) 0.6974(8) 0.0947(3) 0.082(3) Uani 1 1 d . . . 
H83A H 0.6178 0.6744 0.1164 0.124 Uiso 1 1 calc R . . 
H83B H 0.5925 0.7368 0.0802 0.124 Uiso 1 1 calc R . . 
H83C H 0.7255 0.7243 0.1054 0.124 Uiso 1 1 calc R . . 
C84 C 0.9358(8) 0.6570(11) 0.0288(4) 0.116(6) Uani 1 1 d . . . 
H84A H 1.0125 0.6323 0.0409 0.175 Uiso 1 1 calc R . . 
H84B H 0.9387 0.7150 0.0348 0.175 Uiso 1 1 calc R . . 
H84C H 0.9197 0.6491 0.0001 0.175 Uiso 1 1 calc R . . 
C85 C 0.5554(8) 0.6056(7) -0.0254(3) 0.067(3) Uani 1 1 d . . . 
H85A H 0.5316 0.5596 -0.0432 0.101 Uiso 1 1 calc R . . 
H85B H 0.5696 0.6528 -0.0409 0.101 Uiso 1 1 calc R . . 
H85C H 0.4918 0.6179 -0.0114 0.101 Uiso 1 1 calc R . . 
N3 N 0.3142(11) 0.9049(9) 0.1549(4) 0.152(5) Uani 1 1 d DU . . 
C95 C 0.4809(17) 0.8039(14) 0.1552(7) 0.240(13) Uani 1 1 d DU . . 
H95A H 0.5045 0.7473 0.1601 0.360 Uiso 1 1 calc R . . 
H95B H 0.5398 0.8390 0.1719 0.360 Uiso 1 1 calc R . . 
H95C H 0.4766 0.8168 0.1273 0.360 Uiso 1 1 calc R . . 
C94 C 0.219(2) 0.9292(12) 0.1778(8) 0.258(14) Uani 1 1 d DU . . 
H94A H 0.1441 0.9003 0.1664 0.310 Uiso 1 1 calc R . . 
H94B H 0.2456 0.9119 0.2057 0.310 Uiso 1 1 calc R . . 
C93 C 0.1950(19) 1.0194(12) 0.1766(7) 0.203(10) Uani 1 1 d DU . . 
H93A H 0.1357 1.0316 0.1923 0.304 Uiso 1 1 calc R . . 
H93B H 0.1647 1.0365 0.1492 0.304 Uiso 1 1 calc R . . 
H93C H 0.2691 1.0484 0.1877 0.304 Uiso 1 1 calc R . . 
C92 C 0.174(2) 0.853(2) 0.0919(6) 0.298(16) Uani 1 1 d DU . . 
H92A H 0.1470 0.8635 0.0635 0.448 Uiso 1 1 calc R . . 
H92B H 0.1069 0.8568 0.1049 0.448 Uiso 1 1 calc R . . 
H92C H 0.2088 0.7986 0.0957 0.448 Uiso 1 1 calc R . . 
C91 C 0.270(3) 0.9155(16) 0.1099(5) 0.75(7) Uani 1 1 d DU . . 
H91A H 0.2358 0.9704 0.1045 0.897 Uiso 1 1 calc R . . 
H91B H 0.3381 0.9106 0.0969 0.897 Uiso 1 1 calc R . . 
C90 C 0.3584(17) 0.8174(10) 0.1650(6) 0.217(11) Uani 1 1 d DU . . 
H90A H 0.3637 0.8070 0.1935 0.261 Uiso 1 1 calc R . . 
H90B H 0.3003 0.7788 0.1497 0.261 Uiso 1 1 calc R . . 
O30 O 0.3800(7) 0.0032(7) 0.0958(3) 0.112(3) Uani 1 1 d . . . 
 
loop_ 
 _atom_site_aniso_label 
 _atom_site_aniso_U_11 
 _atom_site_aniso_U_22 
 _atom_site_aniso_U_33 
 _atom_site_aniso_U_23 
 _atom_site_aniso_U_13 
 _atom_site_aniso_U_12 
Co1 0.0115(3) 0.0088(3) 0.0097(3) -0.0038(3) 0.0043(3) -0.0004(3) 
Co2 0.0182(4) 0.0052(3) 0.0073(3) 0.0012(3) 0.0014(3) -0.0025(3) 
Co3 0.0130(3) 0.0101(3) 0.0047(3) -0.0027(3) 0.0035(3) -0.0005(3) 
Co4 0.0154(3) 0.0081(3) 0.0061(3) -0.0021(3) 0.0044(3) -0.0029(3) 
O1 0.0140(14) 0.0082(14) 0.0098(15) -0.0012(12) 0.0039(12) -0.0009(12) 
O2 0.0111(15) 0.0258(19) 0.033(2) -0.0086(17) 0.0115(15) -0.0031(15) 
O3 0.0209(17) 0.0170(18) 0.031(2) 0.0028(16) 0.0019(15) 0.0045(15) 
O4 0.0145(16) 0.030(2) 0.032(2) -0.0157(17) 0.0129(15) -0.0009(15) 
O5 0.0231(18) 0.028(2) 0.0178(18) 0.0124(16) 0.0043(14) -0.0045(16) 
O6 0.039(2) 0.0072(15) 0.0133(17) 0.0025(13) 0.0051(15) -0.0040(15) 
O7 0.0289(18) 0.0189(18) 0.0087(16) 0.0051(14) -0.0061(14) -0.0030(15) 
O8 0.041(2) 0.0128(17) 0.0189(18) -0.0068(14) 0.0147(16) 0.0015(16) 
O9 0.0285(18) 0.0199(17) 0.0065(15) -0.0017(14) 0.0033(13) -0.0004(15) 
O10 0.0119(15) 0.027(2) 0.0213(18) -0.0143(16) 0.0019(13) 0.0046(14) 
O11 0.0146(16) 0.0257(19) 0.0200(18) -0.0122(16) -0.0028(13) -0.0036(15) 
O12 0.047(2) 0.0197(19) 0.0183(19) 0.0117(16) 0.0062(17) -0.0122(18) 
O13 0.0348(19) 0.0089(16) 0.0220(18) -0.0022(14) 0.0173(16) -0.0052(15) 
O14 0.0239(16) 0.0089(14) 0.0105(15) 0.0010(12) 0.0092(13) 0.0068(13) 
O15 0.0253(17) 0.0121(16) 0.0149(17) -0.0025(14) 0.0035(14) -0.0069(14) 
O20 0.072(3) 0.028(2) 0.019(2) -0.0072(18) 0.004(2) 0.031(2) 
O21 0.028(2) 0.046(3) 0.032(2) 0.011(2) -0.0007(17) 0.019(2) 
O22 0.058(3) 0.020(2) 0.039(2) 0.0029(18) 0.036(2) 0.003(2) 
O23 0.053(3) 0.034(2) 0.056(3) -0.016(2) 0.036(2) -0.021(2) 
O24 0.056(3) 0.026(2) 0.070(3) -0.026(2) 0.038(3) -0.021(2) 
O25 0.0213(18) 0.049(3) 0.039(2) -0.034(2) 0.0091(17) -0.0107(19) 
O26 0.037(3) 0.107(5) 0.100(5) -0.090(4) 0.034(3) -0.019(3) 
O27 0.171(7) 0.035(3) 0.012(2) -0.001(2) 0.009(3) -0.018(4) 
O28 0.035(2) 0.0170(17) 0.0151(17) -0.0092(14) 0.0011(15) -0.0144(16) 
O29 0.036(2) 0.0215(18) 0.0069(16) 0.0013(14) 0.0010(14) -0.0028(16) 
C17 0.027(2) 0.009(2) 0.006(2) 0.0000(17) -0.0003(18) -0.0055(19) 
C19 0.016(2) 0.008(2) 0.014(2) 0.0022(18) 0.0050(18) 0.0032(17) 
C20 0.020(2) 0.0046(19) 0.008(2) -0.0003(16) 0.0046(17) -0.0024(17) 
C21 0.009(2) 0.017(2) 0.019(2) -0.0071(19) 0.0047(18) -0.0006(18) 
C24 0.011(2) 0.015(2) 0.016(2) -0.0098(19) 0.0042(18) -0.0030(18) 
C25 0.019(2) 0.017(2) 0.011(2) 0.0007(19) 0.0082(19) 0.0006(19) 
C27 0.030(3) 0.015(2) 0.024(3) 0.003(2) 0.010(2) 0.009(2) 
C28 0.015(2) 0.014(2) 0.012(2) -0.0051(18) 0.0015(17) 0.0006(18) 
C30 0.023(2) 0.013(2) 0.013(2) -0.0011(19) 0.0039(18) 0.0062(19) 
C31 0.025(2) 0.011(2) 0.011(2) 0.0035(18) -0.0028(19) -0.0002(19) 
C32 0.012(2) 0.026(3) 0.021(2) -0.010(2) 0.0051(19) -0.004(2) 
C33 0.028(2) 0.006(2) 0.017(2) -0.0052(18) 0.011(2) -0.0012(19) 
C34 0.020(2) 0.009(2) 0.009(2) -0.0033(17) 0.0014(17) -0.0050(18) 
C35 0.020(2) 0.014(2) 0.012(2) -0.0001(18) 0.0022(18) 0.0065(19) 
C36 0.030(3) 0.013(2) 0.008(2) 0.0014(18) 0.0038(19) 0.009(2) 
C37 0.013(2) 0.012(2) 0.016(2) -0.0013(18) 0.0038(18) -0.0021(18) 
C38 0.020(2) 0.015(2) 0.011(2) 0.0017(19) -0.0007(18) 0.0043(19) 
C39 0.021(2) 0.016(2) 0.009(2) 0.0019(18) -0.0001(18) 0.009(2) 
C40 0.026(2) 0.008(2) 0.015(2) -0.0024(18) 0.0052(19) -0.0065(19) 
C41 0.026(2) 0.013(2) 0.009(2) 0.0014(18) 0.0045(19) -0.006(2) 
C42 0.032(3) 0.015(2) 0.019(3) -0.007(2) 0.012(2) 0.000(2) 
C43 0.026(2) 0.006(2) 0.013(2) 0.0042(18) 0.0061(19) -0.0038(18) 
C44 0.035(3) 0.013(2) 0.031(3) -0.011(2) 0.016(2) -0.008(2) 
C45 0.027(2) 0.012(2) 0.021(2) 0.0004(19) 0.017(2) 0.002(2) 
C46 0.009(2) 0.018(2) 0.020(2) -0.005(2) 0.0072(18) -0.0005(18) 
C49 0.019(2) 0.025(3) 0.019(2) -0.013(2) 0.007(2) -0.004(2) 
C50 0.0081(19) 0.022(2) 0.016(2) -0.010(2) 0.0039(17) -0.0032(19) 
C51 0.037(3) 0.010(2) 0.009(2) 0.0028(18) 0.006(2) -0.005(2) 
C53 0.034(3) 0.013(2) 0.008(2) -0.0014(18) -0.003(2) -0.009(2) 
C54 0.011(2) 0.022(2) 0.027(3) -0.008(2) 0.0131(19) 0.0016(19) 
C55 0.031(3) 0.014(2) 0.022(3) -0.006(2) 0.015(2) -0.002(2) 
C56 0.032(3) 0.017(2) 0.034(3) -0.003(2) 0.012(3) -0.005(2) 
C57 0.051(3) 0.016(2) 0.014(2) 0.001(2) 0.009(2) -0.002(2) 
C58 0.030(3) 0.010(2) 0.024(3) -0.005(2) 0.015(2) -0.001(2) 
C61 0.021(2) 0.034(3) 0.030(3) -0.026(3) 0.011(2) -0.008(2) 
C63 0.024(2) 0.011(2) 0.032(3) -0.004(2) 0.012(2) -0.003(2) 
N1 0.031(3) 0.048(3) 0.030(3) -0.002(2) 0.013(2) -0.004(2) 
C70 0.187(15) 0.104(12) 0.26(2) -0.089(14) 0.172(16) -0.075(12) 
C71 0.059(6) 0.158(15) 0.104(9) 0.022(10) -0.007(6) 0.040(8) 
C72 0.093(7) 0.087(8) 0.049(5) -0.006(5) 0.017(5) 0.000(6) 
C73 0.096(7) 0.064(6) 0.102(8) -0.015(6) 0.052(7) 0.000(6) 
C74 0.109(8) 0.070(7) 0.092(7) -0.036(6) 0.058(7) -0.040(6) 
C75 0.060(5) 0.067(6) 0.040(4) 0.006(4) 0.005(4) 0.010(4) 
N2 0.043(3) 0.031(3) 0.047(3) 0.000(3) 0.009(3) -0.002(2) 
C80 0.053(7) 0.146(17) 0.40(3) 0.14(2) 0.047(12) 0.028(9) 
C81 0.66(5) 0.097(13) 0.158(15) 0.046(12) 0.27(3) 0.13(2) 
C82 0.232(19) 0.039(6) 0.149(13) 0.016(7) -0.116(14) -0.041(9) 
C83 0.106(8) 0.092(9) 0.052(5) 0.002(6) 0.025(5) -0.014(7) 
C84 0.031(4) 0.210(19) 0.108(9) 0.052(11) 0.014(5) 0.008(7) 
C85 0.070(6) 0.072(7) 0.055(5) -0.010(5) 0.001(4) -0.020(5) 
N3 0.155(8) 0.142(9) 0.198(9) 0.008(7) 0.126(7) 0.005(7) 
C95 0.241(15) 0.239(16) 0.244(15) 0.013(10) 0.059(10) -0.005(10) 
C94 0.260(17) 0.255(17) 0.268(16) -0.003(10) 0.077(10) -0.010(10) 
C93 0.204(13) 0.200(13) 0.201(13) -0.007(9) 0.038(9) 0.018(9) 
C92 0.290(18) 0.292(19) 0.321(18) -0.014(10) 0.085(10) 0.008(10) 
C91 0.75(7) 0.75(7) 0.75(7) 0.001(10) 0.162(18) 0.003(10) 
C90 0.207(13) 0.235(15) 0.222(13) 0.020(10) 0.074(9) 0.020(10) 
O30 0.088(5) 0.158(11) 0.091(6) -0.004(6) 0.022(5) 0.036(6) 
 
_geom_special_details 
; 
 All esds (except the esd in the dihedral angle between two l.s. planes) 
 are estimated using the full covariance matrix.  The cell esds are taken 
 into account individually in the estimation of esds in distances, angles 
 and torsion angles; correlations between esds in cell parameters are only 
 used when they are defined by crystal symmetry.  An approximate (isotropic) 
 treatment of cell esds is used for estimating esds involving l.s. planes. 
; 
 
loop_ 
 _geom_bond_atom_site_label_1 
 _geom_bond_atom_site_label_2 
 _geom_bond_distance 
 _geom_bond_site_symmetry_2 
 _geom_bond_publ_flag 
Co1 O5 1.978(4) . ? 
Co1 O3 2.003(4) . ? 
Co1 O2 2.043(3) . ? 
Co1 O1 2.053(3) . ? 
Co1 O4 2.167(3) . ? 
Co2 O7 1.952(3) . ? 
Co2 O15 1.969(3) . ? 
Co2 O6 1.984(3) . ? 
Co2 O8 1.987(4) . ? 
Co3 O10 2.042(3) . ? 
Co3 O9 2.065(3) . ? 
Co3 O1 2.078(3) . ? 
Co3 O28 2.083(4) 1_545 ? 
Co3 O14 2.143(3) 3_565 ? 
Co4 O12 1.958(4) 3_575 ? 
Co4 O11 1.968(3) . ? 
Co4 O1 1.984(3) . ? 
Co4 O13 1.991(4) 3_565 ? 
O2 C37 1.249(6) . ? 
O3 C27 1.279(6) . ? 
O4 C50 1.242(6) . ? 
O5 C25 1.278(6) . ? 
O6 C19 1.260(6) . ? 
O7 C31 1.293(6) . ? 
O8 C42 1.278(6) . ? 
O9 C25 1.248(6) . ? 
O10 C50 1.273(6) . ? 
O11 C37 1.247(6) . ? 
O12 C57 1.254(7) . ? 
O12 Co4 1.958(4) 3_575 ? 
O13 C20 1.249(6) . ? 
O13 Co4 1.991(4) 3_565 ? 
O14 C20 1.262(5) . ? 
O14 Co3 2.143(3) 3_565 ? 
O15 C19 1.258(6) 3_475 ? 
O20 C27 1.231(7) . ? 
O21 C31 1.230(7) . ? 
O22 C42 1.240(7) . ? 
O23 C56 1.203(7) . ? 
O24 C56 1.322(7) . ? 
O25 C61 1.308(6) . ? 
O26 C61 1.190(7) . ? 
O27 C57 1.229(7) . ? 
O28 C28 1.263(6) . ? 
O28 Co3 2.083(4) 1_565 ? 
O29 C28 1.257(6) . ? 
C17 C34 1.394(6) . ? 
C17 C43 1.395(7) . ? 
C17 H17A 0.9300 . ? 
C19 O15 1.258(6) 3_475 ? 
C19 C43 1.505(6) . ? 
C20 C33 1.493(6) . ? 
C21 C32 1.371(7) . ? 
C21 C24 1.402(6) . ? 
C21 C50 1.509(6) 1_655 ? 
C24 C46 1.401(6) . ? 
C24 H24A 0.9300 . ? 
C25 C41 1.498(6) . ? 
C27 C30 1.515(7) . ? 
C28 C34 1.512(6) . ? 
C30 C36 1.371(7) . ? 
C30 C39 1.399(6) . ? 
C31 C38 1.505(7) . ? 
C32 C49 1.387(7) . ? 
C32 H32A 0.9300 . ? 
C33 C58 1.385(6) . ? 
C33 C45 1.394(7) . ? 
C34 C40 1.398(6) . ? 
C35 C38 1.387(7) . ? 
C35 C41 1.396(7) 2 ? 
C35 H35A 0.9300 . ? 
C36 C38 1.387(7) . ? 
C36 H36A 0.9300 . ? 
C37 C46 1.506(6) . ? 
C39 C41 1.403(6) 2 ? 
C39 H39A 0.9300 . ? 
C40 C51 1.386(7) . ? 
C40 H40A 0.9300 . ? 
C41 C35 1.396(7) 2_545 ? 
C41 C39 1.403(6) 2_545 ? 
C42 C55 1.512(6) . ? 
C43 C53 1.388(7) . ? 
C44 C55 1.386(7) . ? 
C44 C63 1.394(7) . ? 
C44 H44A 0.9300 . ? 
C45 C63 1.384(7) . ? 
C45 H45A 0.9300 . ? 
C46 C54 1.386(7) . ? 
C49 C54 1.403(7) . ? 
C49 C61 1.492(7) . ? 
C50 C21 1.509(6) 1_455 ? 
C51 C53 1.395(7) . ? 
C51 C57 1.526(7) . ? 
C53 H53A 0.9300 . ? 
C54 H54A 0.9300 . ? 
C55 C58 1.391(7) . ? 
C56 C63 1.506(7) . ? 
C58 H58A 0.9300 . ? 
N1 C72 1.416(10) . ? 
N1 C74 1.484(11) . ? 
N1 C73 1.531(12) . ? 
C70 C74 1.522(16) . ? 
C70 H70A 0.9600 . ? 
C70 H70B 0.9600 . ? 
C70 H70C 0.9600 . ? 
C71 C73 1.492(14) . ? 
C71 H71A 0.9600 . ? 
C71 H71B 0.9600 . ? 
C71 H71C 0.9600 . ? 
C72 C75 1.546(13) . ? 
C72 H72A 0.9700 . ? 
C72 H72B 0.9700 . ? 
C73 H73A 0.9700 . ? 
C73 H73B 0.9700 . ? 
C74 H74A 0.9700 . ? 
C74 H74B 0.9700 . ? 
C75 H75A 0.9600 . ? 
C75 H75B 0.9600 . ? 
C75 H75C 0.9600 . ? 
N2 C80 1.428(13) . ? 
N2 C82 1.443(13) . ? 
N2 C81 1.465(15) . ? 
C80 C84 1.367(18) . ? 
C80 H80A 0.9700 . ? 
C80 H80B 0.9700 . ? 
C81 C83 1.360(18) . ? 
C81 H81A 0.9700 . ? 
C81 H81B 0.9700 . ? 
C82 C85 1.391(15) . ? 
C82 H82A 0.9700 . ? 
C82 H82B 0.9700 . ? 
C83 H83A 0.9600 . ? 
C83 H83B 0.9600 . ? 
C83 H83C 0.9600 . ? 
C84 H84A 0.9600 . ? 
C84 H84B 0.9600 . ? 
C84 H84C 0.9600 . ? 
C85 H85A 0.9600 . ? 
C85 H85B 0.9600 . ? 
C85 H85C 0.9600 . ? 
N3 C94 1.501(9) . ? 
N3 C91 1.508(9) . ? 
N3 C90 1.517(9) . ? 
C95 C90 1.502(9) . ? 
C95 H95A 0.9600 . ? 
C95 H95B 0.9600 . ? 
C95 H95C 0.9600 . ? 
C94 C93 1.487(10) . ? 
C94 H94A 0.9700 . ? 
C94 H94B 0.9700 . ? 
C93 H93A 0.9600 . ? 
C93 H93B 0.9600 . ? 
C93 H93C 0.9600 . ? 
C92 C91 1.505(10) . ? 
C92 H92A 0.9600 . ? 
C92 H92B 0.9600 . ? 
C92 H92C 0.9600 . ? 
C91 H91A 0.9700 . ? 
C91 H91B 0.9700 . ? 
C90 H90A 0.9700 . ? 
C90 H90B 0.9700 . ? 
 
loop_ 
 _geom_angle_atom_site_label_1 
 _geom_angle_atom_site_label_2 
 _geom_angle_atom_site_label_3 
 _geom_angle 
 _geom_angle_site_symmetry_1 
 _geom_angle_site_symmetry_3 
 _geom_angle_publ_flag 
O5 Co1 O3 136.85(16) . . ? 
O5 Co1 O2 91.98(16) . . ? 
O3 Co1 O2 91.84(15) . . ? 
O5 Co1 O1 106.46(15) . . ? 
O3 Co1 O1 114.53(14) . . ? 
O2 Co1 O1 102.56(13) . . ? 
O5 Co1 O4 86.26(16) . . ? 
O3 Co1 O4 80.86(15) . . ? 
O2 Co1 O4 167.10(15) . . ? 
O1 Co1 O4 90.17(13) . . ? 
O7 Co2 O15 114.48(15) . . ? 
O7 Co2 O6 106.95(15) . . ? 
O15 Co2 O6 120.88(15) . . ? 
O7 Co2 O8 99.25(16) . . ? 
O15 Co2 O8 111.45(15) . . ? 
O6 Co2 O8 100.92(15) . . ? 
O10 Co3 O9 90.65(14) . . ? 
O10 Co3 O1 99.04(14) . . ? 
O9 Co3 O1 109.45(13) . . ? 
O10 Co3 O28 93.48(15) . 1_545 ? 
O9 Co3 O28 155.03(15) . 1_545 ? 
O1 Co3 O28 94.21(13) . 1_545 ? 
O10 Co3 O14 171.37(15) . 3_565 ? 
O9 Co3 O14 83.67(13) . 3_565 ? 
O1 Co3 O14 89.00(13) . 3_565 ? 
O28 Co3 O14 89.02(14) 1_545 3_565 ? 
O12 Co4 O11 115.22(17) 3_575 . ? 
O12 Co4 O1 117.75(16) 3_575 . ? 
O11 Co4 O1 111.27(14) . . ? 
O12 Co4 O13 95.27(16) 3_575 3_565 ? 
O11 Co4 O13 107.06(16) . 3_565 ? 
O1 Co4 O13 108.26(14) . 3_565 ? 
Co4 O1 Co1 111.02(14) . . ? 
Co4 O1 Co3 118.30(15) . . ? 
Co1 O1 Co3 102.67(13) . . ? 
C37 O2 Co1 133.8(3) . . ? 
C27 O3 Co1 110.9(3) . . ? 
C50 O4 Co1 140.7(3) . . ? 
C25 O5 Co1 125.7(3) . . ? 
C19 O6 Co2 121.2(3) . . ? 
C31 O7 Co2 113.8(3) . . ? 
C42 O8 Co2 112.5(3) . . ? 
C25 O9 Co3 129.2(3) . . ? 
C50 O10 Co3 114.9(3) . . ? 
C37 O11 Co4 124.4(3) . . ? 
C57 O12 Co4 111.6(4) . 3_575 ? 
C20 O13 Co4 121.2(3) . 3_565 ? 
C20 O14 Co3 126.6(3) . 3_565 ? 
C19 O15 Co2 123.7(3) 3_475 . ? 
C28 O28 Co3 99.5(3) . 1_565 ? 
C34 C17 C43 119.7(4) . . ? 
C34 C17 H17A 120.2 . . ? 
C43 C17 H17A 120.2 . . ? 
O15 C19 O6 125.0(4) 3_475 . ? 
O15 C19 C43 117.2(4) 3_475 . ? 
O6 C19 C43 117.8(4) . . ? 
O13 C20 O14 124.4(4) . . ? 
O13 C20 C33 116.6(4) . . ? 
O14 C20 C33 119.0(4) . . ? 
C32 C21 C24 119.4(4) . . ? 
C32 C21 C50 119.0(4) . 1_655 ? 
C24 C21 C50 121.5(4) . 1_655 ? 
C21 C24 C46 120.2(4) . . ? 
C21 C24 H24A 119.9 . . ? 
C46 C24 H24A 119.9 . . ? 
O9 C25 O5 125.9(4) . . ? 
O9 C25 C41 119.3(4) . . ? 
O5 C25 C41 114.8(4) . . ? 
O20 C27 O3 125.9(5) . . ? 
O20 C27 C30 117.6(5) . . ? 
O3 C27 C30 116.5(5) . . ? 
O29 C28 O28 121.3(4) . . ? 
O29 C28 C34 120.4(4) . . ? 
O28 C28 C34 118.2(4) . . ? 
C36 C30 C39 119.5(4) . . ? 
C36 C30 C27 119.0(4) . . ? 
C39 C30 C27 121.4(4) . . ? 
O21 C31 O7 123.2(5) . . ? 
O21 C31 C38 121.6(5) . . ? 
O7 C31 C38 115.2(4) . . ? 
C21 C32 C49 121.5(4) . . ? 
C21 C32 H32A 119.3 . . ? 
C49 C32 H32A 119.3 . . ? 
C58 C33 C45 119.5(4) . . ? 
C58 C33 C20 119.6(4) . . ? 
C45 C33 C20 120.8(4) . . ? 
C17 C34 C40 120.2(4) . . ? 
C17 C34 C28 122.1(4) . . ? 
C40 C34 C28 117.8(4) . . ? 
C38 C35 C41 119.9(4) . 2 ? 
C38 C35 H35A 120.1 . . ? 
C41 C35 H35A 120.1 2 . ? 
C30 C36 C38 120.8(4) . . ? 
C30 C36 H36A 119.6 . . ? 
C38 C36 H36A 119.6 . . ? 
O11 C37 O2 127.1(4) . . ? 
O11 C37 C46 117.3(4) . . ? 
O2 C37 C46 115.6(4) . . ? 
C35 C38 C36 120.3(4) . . ? 
C35 C38 C31 120.1(4) . . ? 
C36 C38 C31 119.6(4) . . ? 
C30 C39 C41 120.3(4) . 2 ? 
C30 C39 H39A 119.8 . . ? 
C41 C39 H39A 119.8 2 . ? 
C51 C40 C34 119.6(4) . . ? 
C51 C40 H40A 120.2 . . ? 
C34 C40 H40A 120.2 . . ? 
C35 C41 C39 119.1(4) 2_545 2_545 ? 
C35 C41 C25 120.5(4) 2_545 . ? 
C39 C41 C25 120.4(4) 2_545 . ? 
O22 C42 O8 124.8(5) . . ? 
O22 C42 C55 119.7(5) . . ? 
O8 C42 C55 115.5(5) . . ? 
C53 C43 C17 120.3(4) . . ? 
C53 C43 C19 118.9(4) . . ? 
C17 C43 C19 120.7(4) . . ? 
C55 C44 C63 119.7(5) . . ? 
C55 C44 H44A 120.2 . . ? 
C63 C44 H44A 120.2 . . ? 
C63 C45 C33 120.1(4) . . ? 
C63 C45 H45A 120.0 . . ? 
C33 C45 H45A 120.0 . . ? 
C54 C46 C24 119.3(4) . . ? 
C54 C46 C37 119.6(4) . . ? 
C24 C46 C37 121.1(4) . . ? 
C32 C49 C54 119.1(4) . . ? 
C32 C49 C61 122.0(4) . . ? 
C54 C49 C61 119.0(4) . . ? 
O4 C50 O10 126.2(4) . . ? 
O4 C50 C21 115.9(4) . 1_455 ? 
O10 C50 C21 117.8(4) . 1_455 ? 
C40 C51 C53 120.5(4) . . ? 
C40 C51 C57 120.2(4) . . ? 
C53 C51 C57 119.3(4) . . ? 
C43 C53 C51 119.7(4) . . ? 
C43 C53 H53A 120.2 . . ? 
C51 C53 H53A 120.2 . . ? 
C46 C54 C49 120.5(4) . . ? 
C46 C54 H54A 119.8 . . ? 
C49 C54 H54A 119.8 . . ? 
C44 C55 C58 119.9(4) . . ? 
C44 C55 C42 121.7(5) . . ? 
C58 C55 C42 118.4(4) . . ? 
O23 C56 O24 123.1(5) . . ? 
O23 C56 C63 122.8(5) . . ? 
O24 C56 C63 114.1(5) . . ? 
O27 C57 O12 123.0(5) . . ? 
O27 C57 C51 120.1(5) . . ? 
O12 C57 C51 116.8(5) . . ? 
C33 C58 C55 120.5(5) . . ? 
C33 C58 H58A 119.8 . . ? 
C55 C58 H58A 119.8 . . ? 
O26 C61 O25 123.6(5) . . ? 
O26 C61 C49 124.0(5) . . ? 
O25 C61 C49 112.4(4) . . ? 
C45 C63 C44 120.3(5) . . ? 
C45 C63 C56 117.9(4) . . ? 
C44 C63 C56 121.8(5) . . ? 
C72 N1 C74 119.8(9) . . ? 
C72 N1 C73 107.4(7) . . ? 
C74 N1 C73 110.3(7) . . ? 
C74 C70 H70A 109.5 . . ? 
C74 C70 H70B 109.5 . . ? 
H70A C70 H70B 109.5 . . ? 
C74 C70 H70C 109.5 . . ? 
H70A C70 H70C 109.5 . . ? 
H70B C70 H70C 109.5 . . ? 
C73 C71 H71A 109.5 . . ? 
C73 C71 H71B 109.5 . . ? 
H71A C71 H71B 109.5 . . ? 
C73 C71 H71C 109.5 . . ? 
H71A C71 H71C 109.5 . . ? 
H71B C71 H71C 109.5 . . ? 
N1 C72 C75 113.4(8) . . ? 
N1 C72 H72A 108.9 . . ? 
C75 C72 H72A 108.9 . . ? 
N1 C72 H72B 108.9 . . ? 
C75 C72 H72B 108.9 . . ? 
H72A C72 H72B 107.7 . . ? 
C71 C73 N1 112.4(9) . . ? 
C71 C73 H73A 109.1 . . ? 
N1 C73 H73A 109.1 . . ? 
C71 C73 H73B 109.1 . . ? 
N1 C73 H73B 109.1 . . ? 
H73A C73 H73B 107.8 . . ? 
N1 C74 C70 112.9(9) . . ? 
N1 C74 H74A 109.0 . . ? 
C70 C74 H74A 109.0 . . ? 
N1 C74 H74B 109.0 . . ? 
C70 C74 H74B 109.0 . . ? 
H74A C74 H74B 107.8 . . ? 
C72 C75 H75A 109.5 . . ? 
C72 C75 H75B 109.5 . . ? 
H75A C75 H75B 109.5 . . ? 
C72 C75 H75C 109.5 . . ? 
H75A C75 H75C 109.5 . . ? 
H75B C75 H75C 109.5 . . ? 
C80 N2 C82 107.1(14) . . ? 
C80 N2 C81 109.1(15) . . ? 
C82 N2 C81 110.1(15) . . ? 
C84 C80 N2 124.9(14) . . ? 
C84 C80 H80A 106.1 . . ? 
N2 C80 H80A 106.1 . . ? 
C84 C80 H80B 106.1 . . ? 
N2 C80 H80B 106.1 . . ? 
H80A C80 H80B 106.3 . . ? 
C83 C81 N2 127.5(17) . . ? 
C83 C81 H81A 105.4 . . ? 
N2 C81 H81A 105.4 . . ? 
C83 C81 H81B 105.4 . . ? 
N2 C81 H81B 105.4 . . ? 
H81A C81 H81B 106.0 . . ? 
C85 C82 N2 122.5(12) . . ? 
C85 C82 H82A 106.7 . . ? 
N2 C82 H82A 106.7 . . ? 
C85 C82 H82B 106.7 . . ? 
N2 C82 H82B 106.7 . . ? 
H82A C82 H82B 106.6 . . ? 
C81 C83 H83A 109.5 . . ? 
C81 C83 H83B 109.5 . . ? 
H83A C83 H83B 109.5 . . ? 
C81 C83 H83C 109.5 . . ? 
H83A C83 H83C 109.5 . . ? 
H83B C83 H83C 109.5 . . ? 
C80 C84 H84A 109.5 . . ? 
C80 C84 H84B 109.5 . . ? 
H84A C84 H84B 109.5 . . ? 
C80 C84 H84C 109.5 . . ? 
H84A C84 H84C 109.5 . . ? 
H84B C84 H84C 109.5 . . ? 
C82 C85 H85A 109.5 . . ? 
C82 C85 H85B 109.5 . . ? 
H85A C85 H85B 109.5 . . ? 
C82 C85 H85C 109.5 . . ? 
H85A C85 H85C 109.5 . . ? 
H85B C85 H85C 109.5 . . ? 
C94 N3 C91 111.9(9) . . ? 
C94 N3 C90 111.4(8) . . ? 
C91 N3 C90 110.8(9) . . ? 
C90 C95 H95A 109.5 . . ? 
C90 C95 H95B 109.5 . . ? 
H95A C95 H95B 109.5 . . ? 
C90 C95 H95C 109.5 . . ? 
H95A C95 H95C 109.5 . . ? 
H95B C95 H95C 109.5 . . ? 
C93 C94 N3 113.1(10) . . ? 
C93 C94 H94A 109.0 . . ? 
N3 C94 H94A 109.0 . . ? 
C93 C94 H94B 109.0 . . ? 
N3 C94 H94B 109.0 . . ? 
H94A C94 H94B 107.8 . . ? 
C94 C93 H93A 109.5 . . ? 
C94 C93 H93B 109.5 . . ? 
H93A C93 H93B 109.5 . . ? 
C94 C93 H93C 109.5 . . ? 
H93A C93 H93C 109.5 . . ? 
H93B C93 H93C 109.5 . . ? 
C91 C92 H92A 109.5 . . ? 
C91 C92 H92B 109.5 . . ? 
H92A C92 H92B 109.5 . . ? 
C91 C92 H92C 109.5 . . ? 
H92A C92 H92C 109.5 . . ? 
H92B C92 H92C 109.5 . . ? 
C92 C91 N3 112.7(10) . . ? 
C92 C91 H91A 109.0 . . ? 
N3 C91 H91A 109.0 . . ? 
C92 C91 H91B 109.0 . . ? 
N3 C91 H91B 109.0 . . ? 
H91A C91 H91B 107.8 . . ? 
C95 C90 N3 111.0(10) . . ? 
C95 C90 H90A 109.4 . . ? 
N3 C90 H90A 109.4 . . ? 
C95 C90 H90B 109.4 . . ? 
N3 C90 H90B 109.4 . . ? 
H90A C90 H90B 108.0 . . ? 
 
loop_ 
 _geom_torsion_atom_site_label_1 
 _geom_torsion_atom_site_label_2 
 _geom_torsion_atom_site_label_3 
 _geom_torsion_atom_site_label_4 
 _geom_torsion 
 _geom_torsion_site_symmetry_1 
 _geom_torsion_site_symmetry_2 
 _geom_torsion_site_symmetry_3 
 _geom_torsion_site_symmetry_4 
 _geom_torsion_publ_flag 
O12 Co4 O1 Co1 -125.78(18) 3_575 . . . ? 
O11 Co4 O1 Co1 10.4(2) . . . . ? 
O13 Co4 O1 Co1 127.79(16) 3_565 . . . ? 
O12 Co4 O1 Co3 115.93(19) 3_575 . . . ? 
O11 Co4 O1 Co3 -107.89(19) . . . . ? 
O13 Co4 O1 Co3 9.5(2) 3_565 . . . ? 
O5 Co1 O1 Co4 -87.43(17) . . . . ? 
O3 Co1 O1 Co4 106.39(17) . . . . ? 
O2 Co1 O1 Co4 8.46(19) . . . . ? 
O4 Co1 O1 Co4 -173.58(17) . . . . ? 
O5 Co1 O1 Co3 39.94(17) . . . . ? 
O3 Co1 O1 Co3 -126.23(15) . . . . ? 
O2 Co1 O1 Co3 135.84(15) . . . . ? 
O4 Co1 O1 Co3 -46.20(16) . . . . ? 
O10 Co3 O1 Co4 -165.08(17) . . . . ? 
O9 Co3 O1 Co4 100.99(18) . . . . ? 
O28 Co3 O1 Co4 -70.88(19) 1_545 . . . ? 
O14 Co3 O1 Co4 18.07(17) 3_565 . . . ? 
O10 Co3 O1 Co1 72.32(15) . . . . ? 
O9 Co3 O1 Co1 -21.60(17) . . . . ? 
O28 Co3 O1 Co1 166.53(15) 1_545 . . . ? 
O14 Co3 O1 Co1 -104.53(14) 3_565 . . . ? 
O5 Co1 O2 C37 81.6(5) . . . . ? 
O3 Co1 O2 C37 -141.4(5) . . . . ? 
O1 Co1 O2 C37 -25.8(5) . . . . ? 
O4 Co1 O2 C37 163.5(6) . . . . ? 
O5 Co1 O3 C27 -138.1(3) . . . . ? 
O2 Co1 O3 C27 127.1(3) . . . . ? 
O1 Co1 O3 C27 22.4(4) . . . . ? 
O4 Co1 O3 C27 -63.6(3) . . . . ? 
O5 Co1 O4 C50 -102.5(6) . . . . ? 
O3 Co1 O4 C50 118.8(6) . . . . ? 
O2 Co1 O4 C50 175.0(7) . . . . ? 
O1 Co1 O4 C50 4.0(6) . . . . ? 
O3 Co1 O5 C25 105.9(4) . . . . ? 
O2 Co1 O5 C25 -159.3(4) . . . . ? 
O1 Co1 O5 C25 -55.5(4) . . . . ? 
O4 Co1 O5 C25 33.5(4) . . . . ? 
O7 Co2 O6 C19 140.2(4) . . . . ? 
O15 Co2 O6 C19 -86.5(4) . . . . ? 
O8 Co2 O6 C19 36.9(4) . . . . ? 
O15 Co2 O7 C31 -67.3(4) . . . . ? 
O6 Co2 O7 C31 69.4(3) . . . . ? 
O8 Co2 O7 C31 173.9(3) . . . . ? 
O7 Co2 O8 C42 65.7(4) . . . . ? 
O15 Co2 O8 C42 -55.3(4) . . . . ? 
O6 Co2 O8 C42 175.1(4) . . . . ? 
O10 Co3 O9 C25 -101.0(4) . . . . ? 
O1 Co3 O9 C25 -1.2(4) . . . . ? 
O28 Co3 O9 C25 159.3(4) 1_545 . . . ? 
O14 Co3 O9 C25 85.5(4) 3_565 . . . ? 
O9 Co3 O10 C50 52.2(4) . . . . ? 
O1 Co3 O10 C50 -57.6(4) . . . . ? 
O28 Co3 O10 C50 -152.4(4) 1_545 . . . ? 
O14 Co3 O10 C50 100.9(9) 3_565 . . . ? 
O12 Co4 O11 C37 103.6(4) 3_575 . . . ? 
O1 Co4 O11 C37 -33.8(4) . . . . ? 
O13 Co4 O11 C37 -151.9(4) 3_565 . . . ? 
O7 Co2 O15 C19 -137.7(4) . . . 3_475 ? 
O6 Co2 O15 C19 92.1(4) . . . 3_475 ? 
O8 Co2 O15 C19 -26.1(4) . . . 3_475 ? 
Co2 O6 C19 O15 29.9(6) . . . 3_475 ? 
Co2 O6 C19 C43 -149.1(3) . . . . ? 
Co4 O13 C20 O14 5.7(7) 3_565 . . . ? 
Co4 O13 C20 C33 -174.1(3) 3_565 . . . ? 
Co3 O14 C20 O13 -64.1(6) 3_565 . . . ? 
Co3 O14 C20 C33 115.7(4) 3_565 . . . ? 
C32 C21 C24 C46 -0.4(8) . . . . ? 
C50 C21 C24 C46 178.4(5) 1_655 . . . ? 
Co3 O9 C25 O5 -1.7(7) . . . . ? 
Co3 O9 C25 C41 177.8(3) . . . . ? 
Co1 O5 C25 O9 33.3(7) . . . . ? 
Co1 O5 C25 C41 -146.3(4) . . . . ? 
Co1 O3 C27 O20 -28.3(7) . . . . ? 
Co1 O3 C27 C30 152.2(4) . . . . ? 
Co3 O28 C28 O29 2.5(5) 1_565 . . . ? 
Co3 O28 C28 C34 -177.7(3) 1_565 . . . ? 
O20 C27 C30 C36 -9.8(8) . . . . ? 
O3 C27 C30 C36 169.8(5) . . . . ? 
O20 C27 C30 C39 167.1(5) . . . . ? 
O3 C27 C30 C39 -13.4(7) . . . . ? 
Co2 O7 C31 O21 -4.0(6) . . . . ? 
Co2 O7 C31 C38 174.9(3) . . . . ? 
C24 C21 C32 C49 1.1(8) . . . . ? 
C50 C21 C32 C49 -177.8(5) 1_655 . . . ? 
O13 C20 C33 C58 -14.5(7) . . . . ? 
O14 C20 C33 C58 165.7(5) . . . . ? 
O13 C20 C33 C45 161.8(5) . . . . ? 
O14 C20 C33 C45 -18.0(7) . . . . ? 
C43 C17 C34 C40 -2.3(7) . . . . ? 
C43 C17 C34 C28 179.3(4) . . . . ? 
O29 C28 C34 C17 -7.7(7) . . . . ? 
O28 C28 C34 C17 172.5(5) . . . . ? 
O29 C28 C34 C40 173.8(4) . . . . ? 
O28 C28 C34 C40 -5.9(7) . . . . ? 
C39 C30 C36 C38 -2.7(8) . . . . ? 
C27 C30 C36 C38 174.2(5) . . . . ? 
Co4 O11 C37 O2 25.9(7) . . . . ? 
Co4 O11 C37 C46 -154.3(3) . . . . ? 
Co1 O2 C37 O11 8.3(8) . . . . ? 
Co1 O2 C37 C46 -171.5(3) . . . . ? 
C41 C35 C38 C36 2.2(8) 2 . . . ? 
C41 C35 C38 C31 179.3(5) 2 . . . ? 
C30 C36 C38 C35 0.9(8) . . . . ? 
C30 C36 C38 C31 -176.2(5) . . . . ? 
O21 C31 C38 C35 -18.5(8) . . . . ? 
O7 C31 C38 C35 162.5(5) . . . . ? 
O21 C31 C38 C36 158.6(5) . . . . ? 
O7 C31 C38 C36 -20.3(7) . . . . ? 
C36 C30 C39 C41 1.4(8) . . . 2 ? 
C27 C30 C39 C41 -175.4(5) . . . 2 ? 
C17 C34 C40 C51 0.6(7) . . . . ? 
C28 C34 C40 C51 179.1(4) . . . . ? 
O9 C25 C41 C35 -176.2(5) . . . 2_545 ? 
O5 C25 C41 C35 3.4(7) . . . 2_545 ? 
O9 C25 C41 C39 2.6(7) . . . 2_545 ? 
O5 C25 C41 C39 -177.8(5) . . . 2_545 ? 
Co2 O8 C42 O22 7.8(8) . . . . ? 
Co2 O8 C42 C55 -172.0(4) . . . . ? 
C34 C17 C43 C53 2.1(7) . . . . ? 
C34 C17 C43 C19 -179.1(4) . . . . ? 
O15 C19 C43 C53 -6.2(7) 3_475 . . . ? 
O6 C19 C43 C53 172.9(5) . . . . ? 
O15 C19 C43 C17 175.0(4) 3_475 . . . ? 
O6 C19 C43 C17 -5.9(7) . . . . ? 
C58 C33 C45 C63 0.5(8) . . . . ? 
C20 C33 C45 C63 -175.8(5) . . . . ? 
C21 C24 C46 C54 0.0(8) . . . . ? 
C21 C24 C46 C37 179.0(5) . . . . ? 
O11 C37 C46 C54 179.3(5) . . . . ? 
O2 C37 C46 C54 -0.9(7) . . . . ? 
O11 C37 C46 C24 0.2(7) . . . . ? 
O2 C37 C46 C24 -180.0(5) . . . . ? 
C21 C32 C49 C54 -1.3(9) . . . . ? 
C21 C32 C49 C61 178.9(5) . . . . ? 
Co1 O4 C50 O10 18.0(10) . . . . ? 
Co1 O4 C50 C21 -163.6(4) . . . 1_455 ? 
Co3 O10 C50 O4 14.0(7) . . . . ? 
Co3 O10 C50 C21 -164.4(4) . . . 1_455 ? 
C34 C40 C51 C53 1.2(8) . . . . ? 
C34 C40 C51 C57 -177.7(5) . . . . ? 
C17 C43 C53 C51 -0.3(8) . . . . ? 
C19 C43 C53 C51 -179.1(5) . . . . ? 
C40 C51 C53 C43 -1.4(8) . . . . ? 
C57 C51 C53 C43 177.5(5) . . . . ? 
C24 C46 C54 C49 -0.2(8) . . . . ? 
C37 C46 C54 C49 -179.3(5) . . . . ? 
C32 C49 C54 C46 0.9(8) . . . . ? 
C61 C49 C54 C46 -179.3(5) . . . . ? 
C63 C44 C55 C58 0.2(9) . . . . ? 
C63 C44 C55 C42 179.8(5) . . . . ? 
O22 C42 C55 C44 -153.2(6) . . . . ? 
O8 C42 C55 C44 26.6(8) . . . . ? 
O22 C42 C55 C58 26.4(8) . . . . ? 
O8 C42 C55 C58 -153.8(5) . . . . ? 
Co4 O12 C57 O27 0.5(9) 3_575 . . . ? 
Co4 O12 C57 C51 177.7(4) 3_575 . . . ? 
C40 C51 C57 O27 165.5(7) . . . . ? 
C53 C51 C57 O27 -13.4(9) . . . . ? 
C40 C51 C57 O12 -11.8(8) . . . . ? 
C53 C51 C57 O12 169.3(5) . . . . ? 
C45 C33 C58 C55 1.2(8) . . . . ? 
C20 C33 C58 C55 177.5(5) . . . . ? 
C44 C55 C58 C33 -1.5(9) . . . . ? 
C42 C55 C58 C33 178.9(5) . . . . ? 
C32 C49 C61 O26 174.9(8) . . . . ? 
C54 C49 C61 O26 -4.9(11) . . . . ? 
C32 C49 C61 O25 -4.8(9) . . . . ? 
C54 C49 C61 O25 175.4(5) . . . . ? 
C33 C45 C63 C44 -1.8(8) . . . . ? 
C33 C45 C63 C56 177.6(5) . . . . ? 
C55 C44 C63 C45 1.5(9) . . . . ? 
C55 C44 C63 C56 -177.9(5) . . . . ? 
O23 C56 C63 C45 0.5(9) . . . . ? 
O24 C56 C63 C45 -178.6(5) . . . . ? 
O23 C56 C63 C44 180.0(6) . . . . ? 
O24 C56 C63 C44 0.8(9) . . . . ? 
C74 N1 C72 C75 59.3(11) . . . . ? 
C73 N1 C72 C75 -174.0(8) . . . . ? 
C72 N1 C73 C71 174.5(10) . . . . ? 
C74 N1 C73 C71 -53.3(11) . . . . ? 
C72 N1 C74 C70 55.5(14) . . . . ? 
C73 N1 C74 C70 -69.9(14) . . . . ? 
C82 N2 C80 C84 97(2) . . . . ? 
C81 N2 C80 C84 -144(2) . . . . ? 
C80 N2 C81 C83 97(3) . . . . ? 
C82 N2 C81 C83 -146(3) . . . . ? 
C80 N2 C82 C85 -154.9(17) . . . . ? 
C81 N2 C82 C85 87(2) . . . . ? 
C91 N3 C94 C93 -69(3) . . . . ? 
C90 N3 C94 C93 166(2) . . . . ? 
C94 N3 C91 C92 -71(3) . . . . ? 
C90 N3 C91 C92 54(3) . . . . ? 
C94 N3 C90 C95 -159(2) . . . . ? 
C91 N3 C90 C95 76(2) . . . . ? 
 
_diffrn_measured_fraction_theta_max    0.974 
_diffrn_reflns_theta_full              72.98 
_diffrn_measured_fraction_theta_full   0.974 
_refine_diff_density_max    1.351 
_refine_diff_density_min   -0.877 
_refine_diff_density_rms    0.127 
